# Supplementary material for: Sexual behaviors and associated factors among youths in Nekemte town, East Wollega, Oromia, Ethiopia: A cross-sectional study
Source: PubMed Central journal article supplement (PMC6663068; doi:10.1371/journal.pone.0220235), 2019-07-29
Supplement: pone.0220235.s001.pdf [file pone.0220235.s001.pdf]

## Annex-I Questioner ‘English’

Hello, how are you? My name is \_\_\_\_\_. I am a member of data collectors on “Sexual behaviors and associated factors among youth in Nekemte town”.

The objective of this study is to identify factors associated with Sexual behaviors for intervention.

In case, if you have any question and doubts you can ask me.

Thankyou for your cooperation!

### Consent

Are you voluntary to give us information? Yes \_\_\_\_\_ No \_\_\_\_\_

Name of data collector

Signature

Date

\_\_\_\_\_

\_\_\_\_\_

\_\_\_\_\_

### Section- 1 Identification and Background

| No | Questions                            | Coding category                                                                               | Skip to |
|----|--------------------------------------|-----------------------------------------------------------------------------------------------|---------|
| 0  | Kebele                               | _____                                                                                         |         |
| 1  | Sex                                  | Male-----1<br>Female-----2                                                                    |         |
| 2  | Your age in years                    | _____                                                                                         |         |
| 3  | Do you have religious participation? | Yes-----1<br>No-----0                                                                         |         |
| 4  | What is your ethnicity?              | Amhara-----1<br>Oromo-----2<br>Tigre-----3<br>Gurage-----4<br>Others-----8<br>(Specify)_____9 |         |
| 5  | Do you have Pocket Money             | Yes-----1<br>No-----0                                                                         |         |
| 6  | Are you currently attending school?  | Yes-----1<br>No-----0                                                                         |         |

### Section-2 Behaviours

| No | Question & filter                                                                          | Coding category                                                                                                                                                                                                                                                                                                                | Skip to |
|----|--------------------------------------------------------------------------------------------|--------------------------------------------------------------------------------------------------------------------------------------------------------------------------------------------------------------------------------------------------------------------------------------------------------------------------------|---------|
| 1  | Have you ever had sexual intercourse?                                                      | Yes-----1<br>No-----0 _____→                                                                                                                                                                                                                                                                                                   | 12      |
| 2  | How old were you when you started Sexual intercourse?                                      | Age in years_____                                                                                                                                                                                                                                                                                                              |         |
| 3  | Do you currently have sexual partner?                                                      | No, -----0<br>Yes, regular sexual partner-----2<br>Yes, occasional sexual partner—3                                                                                                                                                                                                                                            |         |
| 4  | Have you ever had sexual intercourse with commercial sex workers?                          | Yes-----1<br>No-----0                                                                                                                                                                                                                                                                                                          |         |
| 5  | Have you had sexual intercourse during the last 12 months?                                 | Yes-----1<br>No-----0                                                                                                                                                                                                                                                                                                          |         |
| 6  | How many different sexual partners do you have in your lifetime?                           | Number_____                                                                                                                                                                                                                                                                                                                    |         |
|    |                                                                                            | I can't remember_____                                                                                                                                                                                                                                                                                                          |         |
| 7  | How frequently were you using condom in the last 12 months?                                | Never used-----1<br>Sometimes-----2<br>Most of the times-----3<br>Always-----4                                                                                                                                                                                                                                                 |         |
| 8  | The first time you have sex with your partner did you use condom to prevent HIV infection? | Yes-----1<br>No-----0                                                                                                                                                                                                                                                                                                          |         |
| 9  | If you were not using condom every time what was /were the reasons                         | Condom not available-----1<br>I dislike it-----2<br>My partner refused-----3<br>I have trust on my partner-----4<br>Condoms reduce pleasure-----5<br>I didn't think of it-----6<br>Condoms may have virus-----7<br>Condoms are expensive-----8<br>I am in love with my partner-----9<br>Others-----10<br>(please specify)_____ |         |
| 10 | The last time you had sex with your partner did you use condom to prevent HIV infection    | Yes-----1<br>No-----0                                                                                                                                                                                                                                                                                                          |         |
| 11 | Received money/gift to have sex for past 12 month                                          | Yes-----1<br>No-----0                                                                                                                                                                                                                                                                                                          |         |
| 12 | Ever Viewed pornographic Films                                                             | Yes-----1<br>No-----0                                                                                                                                                                                                                                                                                                          |         |

|    |                                                           |                       |  |
|----|-----------------------------------------------------------|-----------------------|--|
| 13 | Currently do you drink alcohol?                           | Yes-----1<br>No-----0 |  |
| 14 | Currently do you chew Khat?                               | Yes-----1<br>No-----0 |  |
| 15 | Currently do you smoke Cigarette?                         | Yes-----1<br>No-----0 |  |
| 16 | Have you ever practiced the major HIV prevention methods? | Yes-----1<br>No-----0 |  |
| 17 | Have you ever checked sero-status?                        | Yes-----1<br>No-----0 |  |
| 18 | Have you ever visited FGA?                                | Yes-----1<br>No-----0 |  |
| 19 | What services have been offered by FGA?                   | _____                 |  |

## Anex-II Questioner ‘Afan Oromo’

Kaayyoon qorannoo kanaa amala saal-qunnamtii dargaggootaa magaalaa Naqamtee adda baasuun tajaajila barbaachisaa ta’e akka argatan taasisa. Gaaffii fi yaada ifa siif hin taane yoo qabaatte sodaa tokko malee nagaafadhu.

### Unka walii galtee

Odeeffannoo gabaabaa qorannoo kanaaf oolu naaf kennuuf fedha qabdaa? Eeyyee    Lakki  
Maqaa nama odeeffannoo funaanee                      Mallattoo                                              Guyyaa

### Kutaa- 1 Gaaffilee eenyummaa fi seenaa

| Lakk. | Gaaffilee                                             | Koodii                                                                                                          |  |
|-------|-------------------------------------------------------|-----------------------------------------------------------------------------------------------------------------|--|
| 0     | Ganda                                                 | _____                                                                                                           |  |
| 1     | Saala                                                 | Dhiira -----1<br>Dhalaa -----2                                                                                  |  |
| 2     | Umurii                                                | _____                                                                                                           |  |
| 3     | Amantaakee keessatti hirmaannaa qabdaa?               | Eeyyee -----1<br>Lakki -----0                                                                                   |  |
| 4     | Qomoonkee maali?                                      | Oromoo -----1<br>Amaara -----2<br>Tigiree-----3<br>Guragee-----4<br>kanbiroo-----8<br>(barreessi) _____ - ____9 |  |
| 5     | Maallaqa guyya guyyaatti itti fayyadamtu ni argattaa? | Eeyyee -----1<br>Lakki -----0                                                                                   |  |
| 6     | Barumsa barachaa jirtaa?                              | Eeyyee -----1<br>Lakki -----0                                                                                   |  |

**kutaa-2 Amaloota wal-qunnamtii saalaa waliin wal-qabatan**

| Lak. | Gaaffilee                                                                 | Koodii                                                                                                                                                                                                                                                                                                                                       |                               |
|------|---------------------------------------------------------------------------|----------------------------------------------------------------------------------------------------------------------------------------------------------------------------------------------------------------------------------------------------------------------------------------------------------------------------------------------|-------------------------------|
| 1    | Wal-qunnamtii saalaa gootee beektaa?                                      | Eeyyee -----1<br>Lakki -----0                                                                                                                                                                                                                                                                                                                | Lakkii<br>gaaffii<br>12 darbi |
| 2    | Yeroo wal-qunnamtii saalaa jalqabdu umuriinkee meeqa ture?                | _____                                                                                                                                                                                                                                                                                                                                        |                               |
| 3    | Hiriyyaa wal-qunnamtii saalaa waliin raawwattu qabdaa?                    | lakki, -----0<br>Eeyyee, hiriyyaa dhaabbataa-----1<br>Eeyyee, kan dhaabbataa hin taane--2                                                                                                                                                                                                                                                    |                               |
| 4    | Warra mana bunaa hojjetan waliin wal-qunnamtii saalaa raawwattee beektaa? | Eeyyee -----1<br>Lakki -----0                                                                                                                                                                                                                                                                                                                |                               |
| 5    | Ji'a 12 darbe keessa wal-qunnamtii saalaa raawwatteettaa?                 | Eeyyee -----1<br>Lakki -----0                                                                                                                                                                                                                                                                                                                |                               |
| 6    | Hanga harraatti hiriyyaa meeqa waliin wal-qunnamtii saalaa raawwattee?    | _____                                                                                                                                                                                                                                                                                                                                        |                               |
|      |                                                                           | Hin yaadadhu _____                                                                                                                                                                                                                                                                                                                           |                               |
| 7    | Ji'a 12 darbe keessa yeroo meeqa kondomii fayyadamte?                     | Hin fayyadamne-----1<br>Darbee darbee-----2<br>Harka caalu-----3<br>Yeroo hundumaa-----4                                                                                                                                                                                                                                                     |                               |
| 8    | Yeroo jalqaba wal-qunnamtii saalaa raawwattee kondomii fayyadamteettaa?   | Eeyyee -----1<br>Lakki -----0                                                                                                                                                                                                                                                                                                                |                               |
| 9    | Koondomii fayyadamaa hin turre yoo ta'e sababnisaa maali?                 | Koondomii hin arganne-----1<br>Hin jaalladhu-----2<br>Hiriyaakootu dide-----3<br>Hiriyaakoo waanan amanuuf----4<br>Kondomiin gammachuu hirrisa --5<br>Itti hin yaadne -----6<br>Kondomiin vaayirasii qabaachuu danda'a-----7<br>Gatiin koondomii miyaadha -----8<br>Hiriyaakoo waanan jaalladhuuf---9<br>kanbiroo-----10<br>(barreessi)_____ |                               |
| 10   | Wal-qunnamtii saalaa dhuma kana raawwattee irratti koondomii fayyadamtee? | Eeyyee -----1<br>Lakki -----0                                                                                                                                                                                                                                                                                                                |                               |

|    |                                                                                                        |                               |  |
|----|--------------------------------------------------------------------------------------------------------|-------------------------------|--|
| 11 | Ji'a 12n darbe keessa wal-qunnamtii saalaa raawwachuuf maallaqa ykn kennaa fudhatteetaa/laatteetaa?    | Eeyyee -----1<br>Lakki -----0 |  |
| 12 | Fiilmii wal-qunnamtii saalaa qabu ni daawwattaa?                                                       | Eeyyee -----1<br>Lakki -----0 |  |
| 13 | Alkoolii ni dhugdaa?                                                                                   | Eeyyee -----1<br>Lakki -----0 |  |
| 14 | Caatii/Jimaa ni qamaataa?                                                                              | Eeyyee -----1<br>Lakki -----0 |  |
| 15 | Tamboo ni xuuxxaa?                                                                                     | Eeyyee -----1<br>Lakki -----0 |  |
| 16 | Maloota HIV ittiin ittisan fayyadamtee beektaa? (Of qusachuu, amanamuu, kondomii fayyadamuu)           | Eeyyee -----1<br>Lakki -----0 |  |
| 17 | HIV dhaaf dhiigakee qoratamtee beektaa?                                                                | Eeyyee -----1<br>Lakki -----0 |  |
| 18 | Dhaabbata Waldaa Qajeelcha Maatii Damee Naqamtee deemtee beektaa? Tajaajila argachuuf ykn bashannanuuf | Eeyyee -----1<br>Lakki -----0 |  |
| 19 | Tajaajiloota dargaggoonni achii argatan maalfaadha? Barreessi                                          | _____                         |  |
